# Supplementary material for: Molecular Epidemiology of Acinetobacter calcoaceticus-Acinetobacter baumannii Complex Isolated From Children at the Hospital Infantil de México Federico Gómez
Source: Front Microbiol. 2020 Oct 15;11:576673. doi: 10.3389/fmicb.2020.576673 (PMC7593844; doi:10.3389/fmicb.2020.576673)
Supplement: Supplementary file 1 [file Table_1.xlsx]

## Sheet: Supplementary Table 1
								blaOXA genes
								blaOxa51	blaOxa58	blaOxa23	blaOxa24
Strain	Sample	Year of isolation	Wards	Patient	MALDI-TOF-MS-Biotyper	Date of isolation	Profile of resistance	(353pb)	(599pb)	(501pb)	(246pb)	Pulsotype	Number of plasmids	ST (Sequence Type )	CC (Clonal complexes)	CRISPR-Cas system	cas1
34BC	Blood culture	2016	Infectology	P1	A. pittii	02/23/2016	R	+	-	-	-	1	3	667	214
49BC*	Blood culture	2015	Neurosurgery	P2	A. baumannii	11/13/2015	R	+	-	-	-	2	2	462	462
50BC*	Blood culture	2015	Neurosurgery	P2	A. baumannii	11/13/2015	R	+	-	+	-	2	2	462	462
94BC	Blood culture	2015	Emergency	P3	A. baumannii	09/21/2015	R	+	-	+	-	2	2	462	462
219BC	Blood culture	2016	Surgery	P4	A. baumannii	02/15/2016	MDR	+	-	-	-	3	2	1468	ND	CRISPR-Cas IFb
901U	Urine culture	2015	Emergency	P5	A. baumannii	2015-07-11	R	+	-	-	-	4	2	744	64
203D	Bronchial aspirate	2016	Intensive care unit	P6	A. baumannii	2016-05-05	R	+	-	-	-	5	1	163	163
539U	Urine culture	2015	Nephrology	P7	A. pittii	02/19/2015	R	+	-	+	-	6	2	667	214
564U	Urine culture	2015	Nephrology	P7	A. pittii	02/20/2015	R	+	-	+	-	6	2	667	214
268BC	Blood culture	2015	Emergency	P8	A. baumannii	08/26/2015	R	+	-	-	-	7	3	1094	1094
269BC	Blood culture	2015	Emergency	P8	A. baumannii	08/26/2015	R	+	-	-	-	7	3	1094	1094
714D	Bronchial aspirate	2016	Surgical therapy	P9	A. baumannii	2016-11-04	MDR	+	-	+	-	8	1	1256	ND		cas1
A-13	Autopsy	2016	Surgical therapy	P10	A. baumannii	03/29/2016	R	+	-	+	-	9	2	156	79
330BC	Blood culture	2016	Internal Medicine	P11	A. nosocomialis	10/21/2016	R	+	-	-	-	10	0	1166	782
336BC	Blood culture	2016	Internal Medicine	P11	A. baumannii	10/25/2016	R	+	-	-	-	10	0	1166	782
561D	Catheter	2016	Emergency	P12	A. baumannii	10/17/2016	MDR	+	-	-	-	11	2	156	79
361BC	Blood culture	2016	Intensive care unit	P12	A. baumannii	10/24/2016	XDR	+	-	-	-	11	2	156	79
728D	Bronchial aspirate	2016	Intensive care unit	P13	A. baumannii	2016-04-11	MDR	+	-	+	-	11	2	156	79
A-2	Autopsy	2015	Oncology	P14	A. baumannii	01/14/2015	MDR	+	-	+	-	12	3	156	79
810SC	Stool culture	2015	Intensive care unit	P14	A. baumannii	2015-07-01	MDR	+	-	+	-	12	3	156	79
62D	Catheter	2016	Surgery	P15	A. nosocomialis	12/15/2016	R	+	-	-	-	13	3	1166	782		cas1
182BC*	Blood culture	2017	Gastroenterology	P16	A. nosocomialis	2017-02-01	R	+	-	-	-	14	1	1264	1264	CRISPR-Cas IFb
183BC*	Blood culture	2017	Gastroenterology	P16	A. baumannii	2017-02-01	R	+	-	-	-	15	2	156	79
219BC*	Blood culture	2017	Gastroenterology	P16	A. baumannii	2017-02-01	R	+	-	-	-	16	1	1277	ND
578BC	Blood culture	2016	Emergency	P17	A. baumannii	2016-09-07	R	+	-	+	-	17	2	132	132	CRISPR-Cas IFb
769BC	Blood culture	2015	Intensive care unit	P18	A. baumannii	04/20/2015	MDR	+	-	+	-	17	2	156	79	CRISPR-Cas IFb	cas1
494D	Mediastinal tissue	2017	Surgical therapy	P19	A. baumannii	09/28/2017	XDR	+	-	-	-	17	2	156	79
515D	Bronchial aspirate	2017	Surgical therapy	P19	A. baumannii	2017-10-02	XDR	+	-	-	-	17	3	156	79
940BC*	Blood culture	2017	Neurology	P20	A. baumannii	08/25/2017	MDR	+	-	-	-	18	3	1314	ND
154D1	Bronchial aspirate	2017	Neurosurgery	P21	A. baumannii	2017-02-01	MDR	+	-	-	-	19	2	398	132
154D2	Bronchial aspirate	2017	Neurosurgery	P21	A. baumannii	2017-02-01	MDR	+	-	-	-	19	2	398	132
785BC	Blood culture	2016	Emergency	P22	A. baumannii	2016-07-04	R	+	-	-	-	20	3	132	132
169D	Bronchial aspirate	2015	Surgical therapy	P23	A. baumannii	2015-10-04	MDR	+	-	-	-	21	3	907	629
837U	Urine culture	2015	Cardiovascular	P24	A. baumannii	12/30/2015	MDR	+	-	+	-	21	0	2	2
916D	Catheter	2016	Internal Medicine	P25	A. baumannii	2016-08-01	XDR	+	-	+	-	21	0	2	2
139BC	Blood culture	2016	Emergency	P26	A. baumannii	05/21/2016	MDR	+	-	+	-	21	3	156	79
376D	Bronchial aspirate	2017	Intensive care unit	P27	A. baumannii	09/18/2017	R	+	-	-	-	22	2	1296	ND	CRISPR-Cas IFb
455D	Bronchial aspirate	2017	Intensive care unit	P19	A. baumannii	09/24/2017	XDR	+	-	-	+	22	1	1296	ND	CRISPR-Cas IFb
721D	Bronchial aspirate	2017	Cardiology	P28	A. baumannii	2017-07-04	MDR	+	-	+	+	22	3	1296	ND	CRISPR-Cas IFb
815D	Cholesteatoma culture	2017	Internal Medicine	P29	A. baumannii	07/17/2017	MDR	+	-	+	-	22	2	1296	ND	CRISPR-Cas IFb
966CF	Cerebrospinal fluid	2017	Intensive care unit	P20	A. baumannii	06/26/2017	MDR	+	-	+	-	22	2	1296	ND	CRISPR-Cas IFb
995BC	Blood culture	2016	Intensive care unit	P30	A. baumannii	2016-10-03	MDR	+	-	+	+	23	2	156	79
511U	Urine culture	2015	Emergency	P31	A. baumannii	08/25/2015	R	+	-	+	-	24	6	20	20
470BC*	Blood culture	2015	Gastroenterology	P32	A. baumannii	2015-05-06	R	+	-	-	-	25	5	1312	ND
471BC*	Blood culture	2015	Gastroenterology	P32	A. baumannii	2015-05-06	R	+	-	-	-	25	5	1312	ND
618D	Bronchial aspirate	2017	Surgical therapy	P33	A. baumannii	06/26/2017	MDR	+	-	+	-	26	2	282	ND	CRISPR-Cas IFb
996BC	Blood culture	2016	Intensive care unit	P30	A. baumannii	2016-10-03	MDR	+	-	+	-	27	3	156	79
678D	Bronchial aspirate	2016	Intensive care unit	P34	A. baumannii	02/27/2016	MDR	+	-	+	-	28	4	156	79
804U	Urine culture	2015	Neurosurgery	P35	A. baumannii	2015-02-03	R	+	+	+	-	29	2	132	132
855U	Urine culture	2015	Neurosurgery	P35	A. baumannii	2015-04-03	R	+	-	+	-	29	2	132	132
873U	Urine culture	2015	Neurosurgery	P35	A. baumannii	2015-05-03	R	+	-	+	-	29	2	132	132		cas1
986BC	Blood culture	2017	Intensive care unit	P36	A. baumannii	06/18/2017	MDR	+	-	+	-	30	3	282	ND	CRISPR-Cas IFb
658U	Urine culture	2017	Nephrology	P37	A. baumannii	04/27/2017	MDR	+	-	+	-	30	3	282	ND	CRISPR-Cas IFb
52BC	Blood culture	2017	Internal Medicine	P11	A.baumannii	07/26/2017	MDR	+	-	+	-	31	3	282	ND	CRISPR-Cas IFb
136BC*	Blood culture	2017	Nephrology	P38	A. baumannii	07/26/2017	MDR	+	-	-	-	31	2	282	ND	CRISPR-Cas IFb
276BC	Blood culture	2017	Oncology	P39	A. baumannii	05/25/2017	R	+	+	+	-	32	3	1314	ND	CRISPR-Cas IFb
923BC	Blood culture	2017	Intensive care unit	P40	A. baumannii	01/30/2017	R	+	-	+	-	33	3	1328	ND	CRISPR-Cas IFb
928BC*	Blood culture	2017	Neurology	P20	A. baumannii	08/24/2017	MDR	+	-	+	-	33	2	1328	ND
144D*	Bronchial aspirate	2017	Nephrology	P37	A. baumannii	2017-02-05	XDR	+	-	+	-	34	2	1285	ND	CRISPR-Cas IFb
241D	Bronchial aspirate	2017	Emergency	P41	A. baumannii	05/16/2017	XDR	+	-	+	-	34	0	1285	ND	CRISPR-Cas IFb
487D	Bronchial aspirate	2017	Internal Medicine	P42	A. baumannii	06/13/2017	MDR	+	-	-	-	34	2	1285	ND
580D	Bronchial aspirate	2017	Intensive care unit	P43	A. baumannii	06/22/2017	MDR	+	-	+	-	34	2	1285	ND	CRISPR-Cas IFb
745D	Bronchial aspirate	2016	Emergency	P44	A. pittii	03/16/2016	R	+	-	+	-	35	1	870	ND
568BC*	Blood culture	2015	Cardiology	P45	A. baumannii	2015-07-07	R	+	-	+	-	36	1	132	132	CRISPR-Cas IFb
433BC	Blood culture	2015	Intensive care unit	P14	A. baumannii	2015-12-01	MDR	+	-	+	-	37	3	156	79
434BC	Blood culture	2015	Intensive care unit	P14	A. baumannii	2015-12-01	MDR	+	-	+	-	37	3	156	79
483BC	Blood culture	2015	Intensive care unit	P14	A. baumannii	01/13/2015	MDR	+	-	+	-	37	3	156	79
37D	Catether	2015	Intensive care unit	P46	A. baumannii	2015-01-10	XDR	+	-	-	-	38	0	2	2		cas1
59D	Bronchial aspirate	2015	Emergency	P47	A. baumannii	2015-03-10	R	+	-	-	-	38	0	2	2
642D	Bronchial aspirate	2016	Intensive care unit	P13	A. baumannii	ND	XDR	+	-	+	-	39	4	156	79		cas1
136D	Bronchial aspirate	2016	Cardiology	P48	A. baumannii	12/28/2016	R	+	-	-	-	40	3	20	20
209D	Peritoneal fluid	2015	Intensive care unit	P14	A. baumannii	2015-11-01	XDR	+	-	+	-	41	3	156	79		cas1
ATCC19606					A. baumannii		S	+	-	-	-	42	3	ND	ND
831U	Urine culture	2015	Emergency	P47	A. baumannii	2015-03-10	R	+	-	-	+	43	2	132	132
872BC	Blood culture	2017	Internal Medicine	P11	A. baumannii	07/21/2017	MDR	+	-	-	-	44	3	1281	ND
471SC	Stool culture	2015	Cardiology	P49	A. baumannii	04/18/2015	MDR	+	-	+	-	45	4	156	79
740D	Bronchial aspirate	2016	Surgical therapy	P10	A. baumannii	03/14/2016	MDR	+	-	+	-	45	4	156	79
174D	Catether	2017	Neurology	P20	A. baumannii	08/25/2017	MDR	+	-	-	-	46	1	1072	ND
600BC*	Blood culture	2017	Intensive care unit	P43	A. baumannii	2017-03-06	MDR	+	-	+	-	46	2	1072	ND
436D	Bronchial aspirate	2017	Intensive care unit	P27	A. baumannii	09/20/2017	R	+	-	-	-	47	3	1314	ND
448D	Catether	2017	Nephrology	P28	A. baumannii	09/23/2017	MDR	+	-	-	-	47	1	1314	ND
800BC*	Blood culture	2015	Intensive care unit	P18	A. baumannii	04/20/2015	MDR	+	-	-	-	48	4	156	79
960BC	Blood culture	2015	Classification	P50	A. baumannii	07/14/2015	R	+	-	+	-	48	1	156	79
427D	Bronchial aspirate	2017	Intensive care unit	P27	A. baumannii	09/20/2017	R	+	-	-	-	48	2	156	79
803U	Urine culture	2017	Emergency	P51	A. pittii	08/13/2017	MDR	+	-	-	-	49	3	206	ND
804U	Urine culture	2017	Emergency	P51	A. pittii	08/13/2017	MDR	+	-	-	-	49	3	206	ND
173BC*	Blood culture	2015	Nephrology	P52	A. baumannii	09/22/2015	R	+	-	-	-	50	3	338	132
180BC*	Blood culture	2015	Nephrology	P52	A. baumannii	09/22/2015	R	+	-	-	-	51	3	338	132
181BC*	Blood culture	2015	Nephrology	P52	A. baumannii	09/22/2015	R	+	-	-	-	51	3	338	132
434BCSens	Blood culture				A. baumannii		S	+	-	-	-	52	1	ND	ND
*Strains associated whit infections
The repositories: https://github.com/JetsiMancilla/MLST-A.baumannii and at https://github.com/JetsiMancilla/CRISPR-Cas-System
